# Supplementary material
Source: publisher figshare collection journal article supplement (https://tandf.figshare.com/articles/dataset/_/4478384)
Supplement: Supplementary file 1 [file 2]

Archive with 2 entries (2 files):
- UASA_A_1255636_Supplement.pdf
- software-unblinded.zip
